# Supplementary material
Source: Elsevier journal article supplement (https://www.sciencedirect.com/science/article/pii/S2341192920300986)
Supplement: mmc1 [file S2341192920300986:mmc1.docx]

**Hospital Clínic de Barcelona**, Department of Anesthesiology and Critical Care: Carlos Ferrando, Graciela, Martínez-Pallí, Jordi Mercadal, Guido Muñoz, Ricard Mellado, Adriana Jacas, Marina Vendrell, Gerard Sánchez-Etayo, Amalia Alcón, Isabel Belda, Mercé Agustí, Albert Carramiñana, Isabel Gracia, Miriam Panzeri, Irene León, Jaume Balust, Ricard Navarro, María José Arguís, Maria José Carretero, Cristina Ibáñez, Juan Perdomo, Antonio López, Manuel López, Tomás Cuñat, Marta Ubré, Antonio Ojeda, Andrea Calvo, Eva Rivas, Paola Hurtado, Roger Pujol, Nuria Martín, Javier Tercero, Pepe Sanahuja, Marta Magaldi, Miquel Coca, Elena del Rio, Julia Martínez-Ocon, Paula Masgoret, Angel Caballero, Raquel Risco, Lidia Gómez, Nicolás de Riva, Ana Ruiz, Beatriz, Tena, Sebastián Jaramillo, Jose María Balibrea, Francisco Borja de Lacy, Ana Otero, Ainitze Ibarzabal, Raquel Bravo, Anna Carreras, Daniel Martín-Barreda, Alfonso Jesús Alias, Mariano Balaguer, Jorge Aliaga, Alex Almuedo, Joan Ramón Alonso, Rut Andrea, Gerard Sergi Angelès, Marilyn Arias, Fátima Aziz, Joan Ramon Badía, Enric Barbeta, Toni Torres, Guillem Batiste, Pau Benet, Xavi Borrat, María Borrell, Ernest Bragulat, Inmaculada Carmona, Manuel Castellà, Pedro Castro, Joan Ceravalls, Oscar Comino, Claudia Cucciniello, Clàudia De Deray, Oriol De Diego, Paula De la Matta, Marta Farrero, Javier Fernández, Sara Fernández, Anna Fernández, Miquel Ferrer, Ana Fervienza, María Tallo Forga, Daniel Forné, Clàudia Galán, Andrea Gomez, Eduard Guasch, Maria Hernández- Tejero, Beltrán Jiménez, Pere Leyes, Teresa López, José Antonio Martínez, Jose Muñoz, Ricard Navarro, Josep Maria Nicolás, José Tomás Ortiz, Anna Peiró, Manuel Pérez, Esteban Poch, Margarida Pujol, Eduard Quintana, Bartomeu Ramis, Enric Reverter, Irene Rovira, Pablo Ruiz, Elena Sandoval, Stefan Schneider, Oriol Sibila, Carla Solé, Alex Soriano, Dolors Soy, M. Suárez, Adrián Téllez, Néstor David Toapanta, Antoni Torres, Xavier Urra.

**Hospital Universitario Río Hortega**: César Aldecoa, Alicia Bordell, Silvia Martín, Judith Andrés.

**Hospital Universitario Cruces:** Alberto Martínez Ruiz, Gonzalo Tamayo Medel, Iñaki Bilbao Villasante, Fernando Iturri Clavero, Covadonga Peralta Álvarez, Julia T. Herrera, Andrea García Trancho, Iñaki Sainz Mandiola, Carmen Ruano Suarez, Angela Ruiz Bocos, Eneritz Urrutia Izagirre, Pablo Ortiz de Urbina Fernández, Naiara Apodaka, Leire Prieto Molano, Eunate Ganuza, Iratxe Vallinas, Karmele de Orte, Celia González Paniagua, Gemma Ortiz, Mireia Pérez, Marta López, Estíbaliz Bárcena, Erik Urutxurtu, Maria Jesús Maroño, Blanca Escontrela. Aitziber Ereñozaga, Deiene Lasuen, Ainhoa Zabal, Ane Guereca.

**Hospital del Mar**: Ramón Adalia, Luigi Zattera, Irina Adalid Hernandez, Leire Larrañaga Altuna, Aina Serrallonga Castells, Adriana Vilchez Garcia, María Núñez, Lorena Román.

**Hospital General Universitario De Ciudad Real:** Francisco Javier Redondo Calvo, Ruben Villazala González, Victor Baladron González, Patricia Faba, Omar Montenegro, Natalia Bejarano Ramírez.

**Complejo Asistencial Universitario León:** Sergio Marcos Contreras, Alejandro Garcia Rodríguez, Saleta Rey Vázquez, Cristina Garcia Pérez, Eva Higuera Miguelez, Irene Pérez Blanco, David García Rivera.

**Hospital Urduliz:** Ane Martín de la Fuente, Marta Pardo, Vanessa Rodriguez, Unai Bengoetxea.

**Hospital Universitario de la Princesa:** Fernando Ramasco, Sheila Olga Santidrián Bernal, Alvar Santa Cruz Hernando.

**Hospital Povisa:** Beatriz Domínguez, Ana Vázquez Lima.

**Hospital Ramón y Cajal:** Ángel Candela, Ismael A Acevedo Bambaren, Maria Isabel Albala Blanco, Paloma Alonso Montoiro, Fernando Álvarez Utrera, Juan Avellanosa Esteruelas, Amal Azzam López, Alberto José Balvis Balvis, María Beltrán Martín, Jacobo Benatar Haserfaty, Alberto Berruezo Camacho, Laura Betolaza Weimer, Maria del Mar Carbonell Soto, Cristina Carrasco Seral, Cristina Cerro Zaballos, Elizabeth Claros Llamas, Pilar Coleta Orduna, Ingrid P. Cortes Forero, Pascual Agustín, Crespo Aliseda, María Angélica de Pablo Pajares, Yolanda Díez Remesal, Trinidad Dorado Díaz, Noemí Echevarría Blasco, María Elena Elías Martín, Javier Felices Triviño, Natalia Fernández López, Cristina Fernández Martín, Natalia Ferreiro Pozuelo, Luis Gajate Martín, Clara Gallego Santos, Diego Gil Mayo, María Gómez Rojo, Claudia González Cibrián, Elena Herrera López, Borja Hinojal Olmedillo, Berta Iglesias Gallego, Sassan Khonsari, María Nuria Mane Ruiz, María Manzanero Arroyo, Ana María Mariscal Ortega, Sara Martín Burcio, María del Carmen Martín González, Ascensión Martín Grande, Jose Juan Martín López, Cecilia Martín Rabes, Marcos Martínez Borja, Nilda Martínez Castro, Adolfo Martínez Pérez, Snejana Matcan, Cristina Medrano Viñas, Lisset Miguel Herrera, Adrián Mira Betancur, María Montiel Carbajo, Javier Moya Moradas, Lorena Muñoz Pérez, Mónica Nuñez Murias, Eva Ordiales González, Óscar Ordoñez Recio, Miguel Ángel Palomero Rodriguez, Diego Parise Roux, Lucia Pereira Torres, David Pestaña Lagunas, Juana María Pinto Corraliza, Marian Prieto Rodrigo, Inmaculada Rodriguez Diaz-Regaño, David Rodriguez Esteban, Víctor Rojas Pernia, Álvaro Ruigómez Saiz, Bárbara Saavedra Villarino, Noemí Samaranch Palero, Gloria Santos Pérez, Jaume Serna Pérez, Ana Belén Serrano Romero, Jesús Tercero López, Carlos Tiscar García, Marta de la Torre Concostrina, Eva María Ureta Mesa, Eva Velasco Olarte, Judith Villahoz Martínez, Raúl Villalaba Palacios, Gema Villanueva García, Cristina Vogel de Medeiros.

**Hospital Universitario Severo Ochoa:** Soraya Gholamian Ovejero, Marta Vicente Orgaz, Patricia Lloreda Herradon, Cristina Crespo Gómez.

**Hospital Universitario de Gran Canaria Dr. Negrín:** Tatiana Sarmiento-Trujillo.

**Hospital de Terrassa:** Noemí García Medina, María Martínez García, Carles Espinós Ramírez, Nabil Mouhaffel Rivero, Jose Antonio Bernia Gil.

**Hospital Central de la Cruz Roja San José y Santa Adela:** Sonsoles Martín.

**Hospital de la Santa Creu i Sant Pau:** María Victoria Moral, Josefina Galán, Pilar Paniagua, Sergio Pérez, Albert Bainac, Ana Arias, Elsa Ramil, Jorge Escudero.

**Clínica Universidad de Navarra:** Pablo Monedero, Carmen Cara, Andrea Lara, E. Mendez Martínez, Jorge Mendoza, Íñigo Rubio Baines. Medicina Preventiva y Salud Pública: Alfredo Gea, Alejandro Montero.

**Hospital Universitario Dr. Peset Aleixandre:** Rocío Armero Ibañez, Juan Vicente Llau Pitarch, Fernando Rauer Alcover, Cristina Álvarez Herreros, Cyntia Sánchez Martín, Lucía López Ocáriz Olmos, Marta Navas Moruno.

**Complejo Hospitalario Universitario de Cáceres:** Fernando García Montoto. MF. Mirón Rodriguez, Laura Fuentes Coco, Cristina Hernández Gamito, Antonio Barba Orejudo, Luis Gerardo Smith Vielma, Yasmina González Marín, Francisco de Borja Amador Penco, Marta Donoso Domínguez, Silvia Esquivel Ramírez.

H**ospital Clínico Universitario de Valencia:** José Antonio Carbonell, Berta Monleón López, Sara Martínez-Castro, Gerardo Aguilar.

**Hospital Universitario a Coruña:** María Gestal, Pablo Casas, Angel Outeiro Rosato, Andrea Naveiro Pan, María Alonso Portela, Adrián García Romar, Eva Mosquera Rodríguez, Diego Ruanova Seijo, Pablo Rama Maceiras.

**Complexo Universitario de Ferrol:** Francisco Castro-Ceoane, Esther Moreno López.

**Hospital Clínico Universitario Lozano Blesa:** Sergio Gil, Julia Guillén Antón, Patricia García-Consuegra Tirado, Aurora Callau Calvo, Laura Forés Lisbona, María Carbonell Romero, Belén Albericio Gil, Laura Pradal Jarne, María Soria Lozano, Diego Loscos López, Andrea Patiño Abarca.

**Universal Doctors:** Jordi Serrano.

**UBIKARE**: Javier Pérez-Asenjo, Ángel Díez-Domínguez, Ion Zubizarreta, Jon Ramos, Iosu Fernández.

**Hospital Universitario La Paz:** Emilio Maseda, Alejandro Suárez de la Rica, Javier Veganzones, Itziar Insausti, Javier Sagra, Sofía Díaz Carrasco, Ana Montero Feijoo, Julio Yagüe.

**Hospital Universitario Gregorio Marañon:** Ignacio Garutti.

**Hospital San Joan Despí Moises Broggi:** Eva Bassas Parga, Carmen Deiros Garcia, Elisenda Pujol Rosa, Ana Tejedor Navarro, Roser Font Gabernet, Maria José Bernat, Meritxell Serra Valls, Cristina Cobaleda Garcia-Bernalt, Jesus Fernanz Anton, Adriana Aponte Sierra, Lucia Gil Gomez, Olaia Guenaga Vaqueiro, Susana Hernandez Marin, Laura Pardo Pinzon, Sira Garcia Aranda, Carlos Briones Orejuela, Edgar Cortes Sanchez, Alejandro Romero Fernandez, Esther Fernández Sanjosé, Patricia Iglesias Garsabal, Guillermo Isidro Lopez, Ana Vicol, Sara Espejo Malagon, Maria Sanabra Loewe, Laura Grau Torradeflo, Lourdes Blanco Alcaide, Gloria Buenaventura Sanclemente, Pere Serra Pujol, Gustavo Cuadros Mendoza, Miroslawa Konarska, Fedra Bachs Almenara, Agnieszka Golska, Aleix Carmona Blesa, Arantxa Mas Serra.

**Hospital Universitario Infanta Leonor:** Javier Ripollés Melchor, Ana Nieto Moreno, Káteri Chao Novo, Sandra Gadín López, Elena Nieto Moreno, Bérénice Gutiérrez Tonal, Elena Lucena de Pablo, Barbara Algar Yañez, Beatriz Vázquez Rivero, Beatriz Nozal Mateo, Marina de Retes, Norma Aracil Escoda, Cristina Gallardo Mayo, Rosa Sanz González, Alicia Ruiz Escobar, Maria Laura Pelegrina López, Marina Valenzuela Peña, David Stolle Dueñas, Ane Abad Motos, Alfredo Abad-Gurumeta, Ana Tirado Errazquin, Elena Sáez Ruiz, Nerea Gómez Perez, Francisco de Borja Bau González.

**Hospital sanitas CIMA:** Cesar Morcillo Serra, Jessica Souto Higueras.

**Hospital Universitario y Politécnico La Fé:** Rosario Vicente, Raquel Ferrandis, Silvia Polo Martín, Azucena Pajares Moncho, Ignacio Moreno Puigdollers, Juan Pérez Artacho Cortés, Ana Moret Calvo, Ana Pi Peña, María Catalán Fernández.

**Complexo hospitalario Universitario de Pontevedra:** Marina Varela.

**Hospital Arnau de Vilanova**: María Isabel Forés Chiva.

**Hospital General de Alicante:** A. Javier Agulló.

**Hospital Universitario Infanta Sofía:** Antonio Pérez Ferrer.

**Hospital Universitario San Juan de Alicante**: Maria Galiana.

**Hospital Nuestra Señora de Meritxell SAAS:** Antoni Margarit, Válerie Mourre del Rio, Eva Heras Muxella, Anna Vidal.

Relación de Hospitales para publicaciones por número de Registros:

1. Hospital Clínic Barcelona (216).
2. Hospital Ramón y Cajal (141)

María Gómez-Rojo (Investigadora principal) ([gomezrojo@gmail.com](mailto:gomezrojo@gmail.com))

Ángel Candela ([angel.candela@salud.madrid.org](mailto:angel.candela@salud.madrid.org))

Angélica de Pablo-Pajares ([angelicadepabl@hotmail.com](mailto:angelicadepabl@hotmail.com))

Borja Hinojal ([borja.hinojal@salud.madrid.org](mailto:borja.hinojal@salud.madrid.org))

Luis Gajate ([gajate.luis@gmail.com](mailto:gajate.luis@gmail.com))

1. Hospital Universitario Infanta Leonor (>100)

Javier Ripolles Melchor ([ripo542@gmail.com](mailto:ripo542@gmail.com))

Ana Nieto Moreno ([ananietomoreno@gmail.com](mailto:ananietomoreno@gmail.com))

Káteri Chao Novo ([katerichao@telefonica.net](mailto:katerichao@telefonica.net))

Sandra Gadín López ([sgadinl@gmail.com](mailto:sgadinl@gmail.com))

1. Hospital Universitario Río Hortega (62)

César Aldecoa ([cesar.aldecoa@gmail.com](mailto:cesar.aldecoa@gmail.com))

Alicia Bordell [ali.b.sanchez@gmail.com](mailto:ali.b.sanchez@gmail.com)

Silvia Martín

1. Hospital Universitario Cruces (57)

Maria L. Hernández-Sanz ([marietahersan@gmail.com](mailto:marietahersan@gmail.com))

Gonzalo Tamayo Medel ([gonzalotamayo@gmail.com](mailto:gonzalotamayo@gmail.com))

Alberto Martínez Ruiz ([alberto.martinezruiz@osakidetza.eus](mailto:alberto.martinezruiz@osakidetza.eus))

Julia T. Herrera ([juliaherreradiez@gmail.com](mailto:juliaherreradiez@gmail.com))

Fernando Iturri Clavero ([fic31404@gmail.com](mailto:fic31404@gmail.com))

1. Hospital del Mar (55)

Ramón Adalia ([radalia@parcdesalutmar.cat](mailto:radalia@parcdesalutmar.cat))

Luigi Zattera ([luigizattera@gmail.com](mailto:luigizattera@gmail.com))

Lorena Román

Irina Adalid Hernandez

María Núñez

1. Hospital San Joan Despí Moises Broggi (53)

Eva Bassas Parga ([ebassasp@gmail.com](mailto:ebassasp@gmail.com))

Carmen Deiros Garcia

Elisenda Pujol Rosa

Ana Tejedor Navarro

1. Hospital Nuestra Señora de Meritxell SAAS (38) (Andorra)

Antoni Margarit ([amargarit@saas.ad](mailto:amargarit@saas.ad))

Válerie Mourre del Rio ([valeriemourre@gmail.com](mailto:valeriemourre@gmail.com))

Anna Vidal ([annavidalsegalas@gmail.com](mailto:annavidalsegalas@gmail.com))

1. Hospital General Universitario De Ciudad Real (37)

Francisco Javier Redondo Calvo ([fjredondo@sescam.jccm.es](mailto:fjredondo@sescam.jccm.es))

Ruben Villazala González ([rvillazala@gmail.com](mailto:rvillazala@gmail.com))

Victor Baladron González ([vbaladron@sescam.jccm.es](mailto:vbaladron@sescam.jccm.es))

1. Clínica Universidad de Navarra (30)

Pablo Monedero ([pmonedero@unav.es](mailto:pmonedero@unav.es))

Jorge Mendoza ([jmendoza@unav.es](mailto:jmendoza@unav.es))

Elena Mendez Martínez ([emendezm@unav.edu](mailto:emendezm@unav.edu))

1. Hospital Universitario de la Princesa (28)

Fernando Ramasco ([gorria66@gmail.com](mailto:gorria66@gmail.com))

Sheila Santidrian ([sheilasanber@gmail.com](mailto:sheilasanber@gmail.com))

1. Hospital La Paz (28)

Emilio Maseda ([emilio.maseda@gmail.com](mailto:emilio.maseda@gmail.com))

Pdte.

1. Hospital Urdúliz (25)

Ane Martín de la Fuente ([ANE.MARTINDELAFUENTE@osakidetza.eus](mailto:ANE.MARTINDELAFUENTE@osakidetza.eus))

Marta Pardo

1. Hospital de Terrassa (23)

Noemí García

María Martínez

1. Hospital Universitario a Coruña (21)

Pablo Casas ([pablo.Casas.Reza@sergas.es](mailto:pablo.Casas.Reza@sergas.es))

Angel Outeiro Rosato ([angel.Outeiro.Rosato@sergas.es](mailto:angel.Outeiro.Rosato@sergas.es))

1. Hospital sanitas CIMA (20)
2. Hospital Povisa (17)
3. Hospital Universitario Dr. Peset Aleixandre (15)
4. Hospital Universitario Severo Ochoa (13)
5. Hospital Clínico Universitario Lozano Blesa (12)
6. Complexo Universitario de Ferrol (11)
7. Hospital politécnico La Fé (11)
8. Complejo asistencial universitario León (10)
9. Hospital Universitario Gregorio Marañon

Ignacio Garutti ([ngaruttimartinez@yahoo.es](mailto:ngaruttimartinez@yahoo.es)) (Pdte)
